# Supplementary material for: Copper binding modulates the platination of human copper chaperone Atox1 by antitumor trans-platinum complexes
Source: Royal Society of Chemistry journal article supplement (doi:10.1039/c3mt00338h), 2014-01-01
Supplement: c3mt00338h.pdf [file c3mt00338h.pdf]

## Supporting Information

for

### Copper binding modulates the platination of human copper chaperone Atox1 by antitumor *trans*-platinum complexes

Zhaoyong Xi, Wei Guo, Changlin Tian, Fuyi Wang, Yangzhong Liu

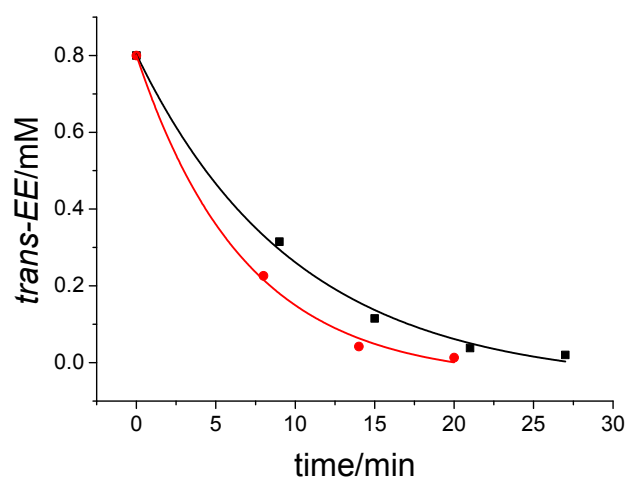

**Fig. S1** Plots of the concentration of unreacted *trans*-EE versus time for the reactions between Atox1 and *trans*-EE in the absence (black square and line) and presence (red circle and line) of copper.

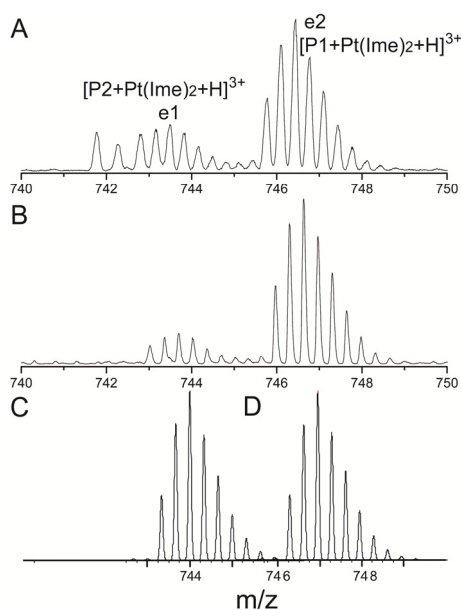

**Fig. S2** Selected ESI-MS spectra of platinumated peptides from trypsin digestion of Atox1. Protein samples were treated with *trans-EE* for 4 h prior to the trypsin digestion. (A) apo-Atox1; (B) Cu<sup>I</sup>-Atox1. The isotopic distributions of the e1 peak (the most abundant isotopomer at  $m/z$  743.70, [P2+Pt(Ime)<sub>2</sub>+H]<sup>3+</sup>) and e2 peak (the most abundant isotopomer at  $m/z$  746.63, [P1+Pt(Ime)<sub>2</sub>+H]<sup>3+</sup>) are well consistent with the simulated patterns (C) and (D). P1 and P2 represent the peptides H<sup>4</sup>EFSVDMTC<sup>12</sup>GGC<sup>15</sup>AEA<sup>21</sup> and V<sup>40</sup>CIESEHSMDTLLATLK<sup>56</sup>, respectively.

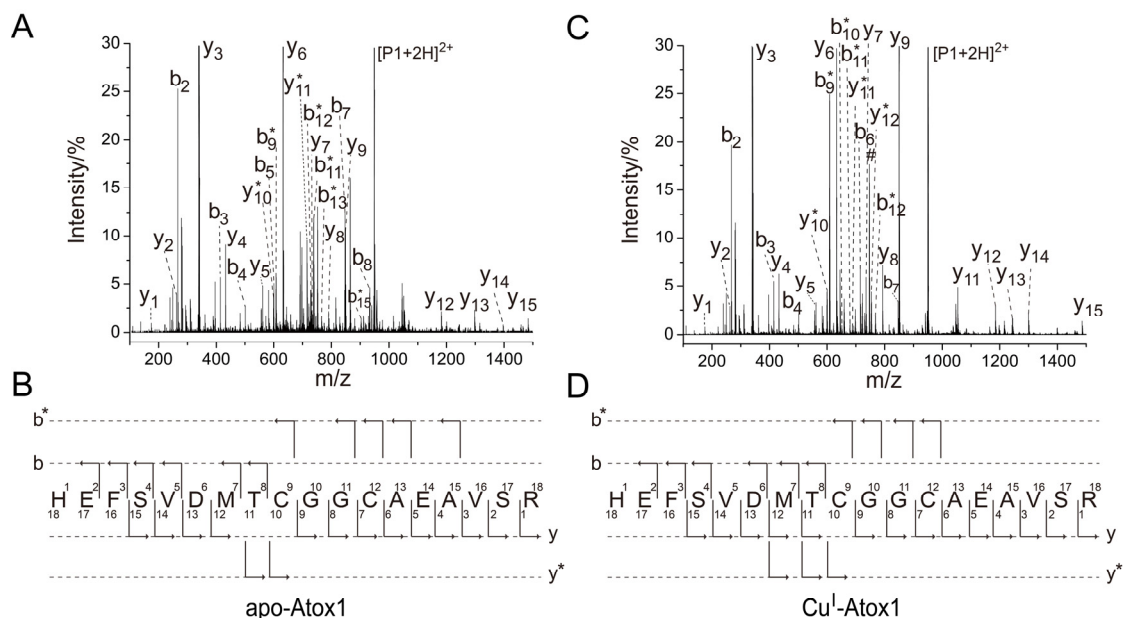

**Fig. S3** ESI-MS/MS spectra of the triply charged ion e2 at  $m/z$  746.63 from trypsin digestion of (A) Atox1 and (C) Cu<sup>I</sup>-Atox1 treated with *trans-EE* for 4 h. Fragmentation schemes based on the spectra (A) and (C) are shown in (B) and (D), respectively. The precursor ion is denoted in #. P1 represents the peptide H<sup>4</sup>EFSVDMTC<sup>12</sup>GGC<sup>15</sup>AEA<sup>21</sup>.

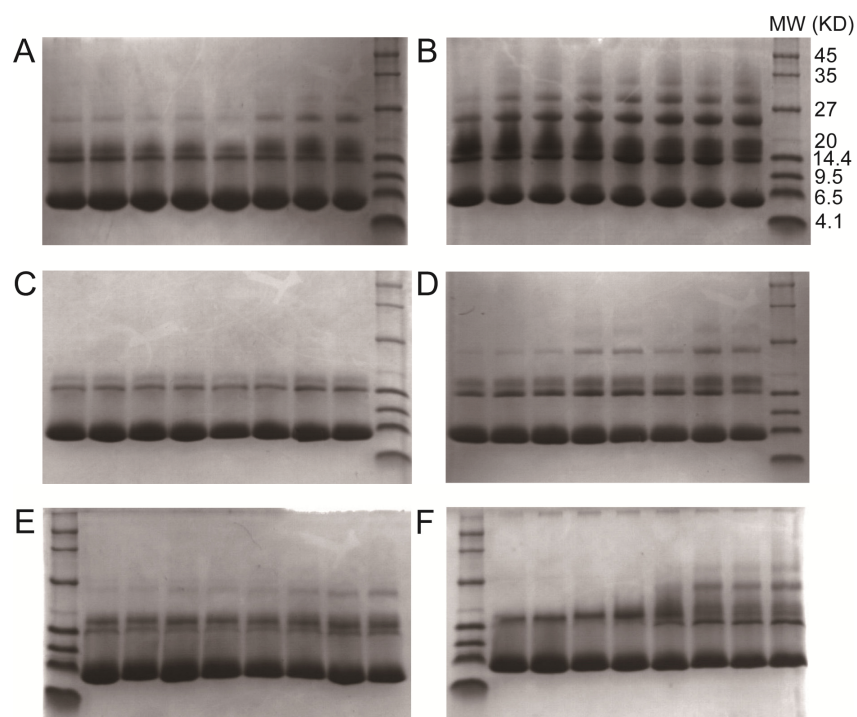

**Fig. S4** Platinum complexes induced protein aggregation monitored by tricine-SDS-PAGE. The protein samples were incubated with equimolar platinum complexes at 25 °C for different time before loading to the gel. Incubation time of the samples is 10 min, 30 min, 1 h, 2 h, 4 h, 8 h, 12 h and 24 h from left to right. (A) cisplatin + apo-Atox1. (B) cisplatin + Cu<sup>I</sup>-Atox1. (C) *trans*-EE + apo-Atox1. (D) *trans*-EE + Cu<sup>I</sup>-Atox1. (E) *trans*-PtTz + apo-Atox1. (F) *trans*-PtTz + Cu<sup>I</sup>-Atox1.
